# Supplementary material for: Computer Assisted Learning: Assessment of the Veterinary Virtual Anatomy Education Software IVALA™
Source: MDPI journal article supplement (doi:10.3390/vetsci5020058), 2018-06-19
Supplement: s1 [file s1]

**Table S1.** Pre-interaction survey Likert response data (n=91).

| Category   | Likert Scale Question                                                                                                                                                                | Median | Mean | Standard Deviation |
|------------|--------------------------------------------------------------------------------------------------------------------------------------------------------------------------------------|--------|------|--------------------|
| Category 1 | What is the general attitude and experience with CAL educational tools and the IVALA™ program?                                                                                       |        |      |                    |
|            | I relied heavily on computer based resources during my previous education.                                                                                                           | 3      | 3.05 | 1.15               |
|            | I enjoy computer based learning.                                                                                                                                                     | 4.00   | 3.73 | 0.65               |
|            | I am interested in using the IVALA™ program.                                                                                                                                         | 5.00   | 4.68 | 0.49               |
|            | I believe the IVALA™ "VITAL" program will be helpful to my learning, understanding, and retention of anatomic information.                                                           | 5.00   | 4.54 | 0.52               |
| Category 2 | What is the perceived educational value of CAL tools in relation to other learning resources?                                                                                        |        |      |                    |
|            | I would rather use computer based learning than paper text.                                                                                                                          | 3.00   | 3.16 | 0.98               |
|            | I would rather use computer based learning than attend live lectures.                                                                                                                | 2.00   | 2.48 | 1.03               |
|            | I would rather use computer based learning than hands on experience of cadaver dissection.                                                                                           | 2.00   | 1.88 | 0.88               |
|            | I would like to have more of my educational resources provided in computerized form, rather than traditional forms like text, live lectures, and laboratory exercises.               | 3.00   | 2.54 | 0.91               |
|            | I could happily do without computer based learning resources. I prefer traditional forms like text, live lectures, and laboratory exercises.                                         | 3.00   | 3.03 | 1.02               |
|            | I wish all of my learning resources were in hard copy text supplemented with hands on experience.                                                                                    | 3.00   | 3.19 | 1.06               |
|            | I believe I would benefit from having all of my learning resources computerized.                                                                                                     | 2.00   | 2.62 | 1.00               |
|            | I think hands on experience through dissection of cadavers can be easily replaced by computerized resources.                                                                         | 2.00   | 2.02 | 0.80               |
|            | I think there is no substitute for hands on experience, no matter how realistic a computerized simulation may be for learning.                                                       | 4.00   | 4.12 | 0.80               |
|            | I think computerized resources should be used as a supplement to traditional learning resources such as text, live lectures and laboratory exercises, but should never replace them. | 4.00   | 4.30 | 0.77               |
|            | I would like the IVALA™ program (or a similar program) to completely replace traditional cadaver based learning in the future.                                                       | 2.00   | 2.09 | 0.94               |
|            | I do not believe the IVALA™ program (or a similar program) could ever completely replace cadaver based anatomy education.                                                            | 4.00   | 3.95 | 0.92               |
|            | I believe a mixture of traditional cadaver based anatomy lessons parallel and complementary to computer based learning would be the best possible experience for my education.       | 5.00   | 4.53 | 0.70               |

Likert Scale; 1 = strongly disagree, 2 = disagree, 3 = neutral, 4 = agree, 5 = strongly agree.

**Table S2.** Coded responses to the Pre-Interaction open-ended question: Provide any comments about your feelings, expectations or concerns regarding your upcoming use of IVALA™. (n = 28).

| <b>Comment category</b>                                  | <b>Number of comments</b> | <b>Percentage of students providing a comment fitting this category</b> |
|----------------------------------------------------------|---------------------------|-------------------------------------------------------------------------|
| I believe there will be educational value in IVALA.      | 28                        | 82.35                                                                   |
| I am doubtful IVALA™ can replace cadaver dissection.     | 7                         | 20.59                                                                   |
| Hands on experience (dissection) is important to me.     | 4                         | 11.76                                                                   |
| I have concern for lack of fidelity or technical issues. | 3                         | 8.82                                                                    |
| Computerized learning is important to me.                | 3                         | 8.82                                                                    |
| Traditional text is important to me.                     | 2                         | 5.88                                                                    |

**Table S3.** Post interaction survey Likert response data. (n = 56).

| Category   | Likert Scale Question                                                                                                                                                         | Median | Mean | Standard Deviation |
|------------|-------------------------------------------------------------------------------------------------------------------------------------------------------------------------------|--------|------|--------------------|
| Category 1 | What is the general attitude and experience with CAL educational tools and the IVALA™ program?                                                                                |        |      |                    |
|            | I enjoyed using the IVALA™ program.                                                                                                                                           | 4      | 3.81 | 1.06               |
|            | I would recommend using the IVALA™ program in future RUSVM anatomy classes.                                                                                                   | 4      | 4.02 | 0.97               |
| Category 2 | If there were an application for my mobile device that was similar to the IVALA™ program, I would use it as a study aid.                                                      | 5      | 4.28 | 1.06               |
|            | What is the perceived educational value of IVALA™ in relation to other learning resources?                                                                                    |        |      |                    |
|            | I believe computerized learning tools like IVALA™ program and other virtual learning tools will be an essential part of anatomy education for future students.                | 4      | 4.05 | 0.77               |
|            | I believe computerized learning models and simulation could completely replace the use of canine cadavers for anatomic education in the future.                               | 2      | 2.07 | 1.12               |
|            | There are already enough computerized anatomy learning resources available for study and I feel that the addition of the IVALA™ program was a burden to my study load.        | 2      | 2.02 | 0.92               |
|            | I would have preferred to spend more time with the IVALA™ program rather than some of the other computer based resources provided for the veterinary anatomy course.          | 3      | 3.30 | 0.84               |
|            | I felt that I did not have enough time to spend with the IVALA™ program because there are so many other anatomy learning resources provided in the veterinary anatomy course. | 3      | 2.82 | 1.07               |
| Category 3 | What effect did IVALA™ have on laboratory dissection experience?                                                                                                              |        |      |                    |
|            | Use of the IVALA™ software made me more confident during laboratory dissection of the cadaver dog.                                                                            | 3      | 3.27 | 1.10               |
|            | Use of the IVALA™ software made me more efficient during laboratory dissection of the cadaver dog                                                                             | 3      | 3.30 | 1.07               |
|            | The IVALA™ program made my dissection of the cadaver dog more clear and understandable.                                                                                       | 4      | 3.56 | 1.05               |
| Category 4 | Was the accuracy, fidelity and content of IVALA™ suitable for this anatomy course?                                                                                            |        |      |                    |
|            | The IVALA™ Virtual specimen looked realistic enough to learn the required anatomy effectively.                                                                                | 4      | 3.74 | 0.95               |
|            | The IVALA™ Virtual specimen exhibited accurate anatomy.                                                                                                                       | 4      | 4.09 | 0.79               |
|            | The IVALA™ virtual specimen is suitable for learning the required anatomic structures for Gross Anatomy semester 1 course (VMA5113).                                          | 4      | 3.67 | 1.02               |
|            | I would like to see the IVALA™ program brought to a higher level of fidelity and accuracy.                                                                                    | 4      | 3.84 | 0.84               |
|            | The IVALA™ program obviously lacks the detail of a cadaver canine specimen and I found these imperfections to be a significant hindrance to my learning.                      | 2      | 2.42 | 0.86               |
|            | The current version of IVALA™ software has the accuracy and fidelity I needed to understand and learn the relevant canine anatomy of the forelimb and hind limb.              | 4      | 3.63 | 0.94               |
| Category 5 | Was the IVALA™ program user friendly?                                                                                                                                         |        |      |                    |
|            | The IVALA™ software was easy to use.                                                                                                                                          | 4      | 3.60 | 1.16               |
|            | Manipulation of the IVALA™ virtual specimen allowed for adequate view of each anatomic structure of interest.                                                                 | 4      | 3.67 | 1.02               |
|            | The IVALA™ virtual specimen was helpful because I could use it whenever / wherever I wanted (as long as I had internet service and access to a computer).                     | 4      | 4.14 | 1.01               |
| Category 6 | Was the IVALA™ program beneficial to anatomic knowledge?                                                                                                                      |        |      |                    |
|            | The IVALA™ program was beneficial to my knowledge of veterinary anatomy.                                                                                                      | 4      | 3.70 | 1.15               |
|            | Even though the fidelity and accuracy of the IVALA™ program was not perfect, I found its use to be beneficial to my overall knowledge.                                        | 4      | 3.93 | 0.82               |

Likert Scale; 1 = strongly disagree, 2 = disagree, 3 = neutral, 4 = agree, 5 = strongly agree.

**Table S4.** Coded responses to the post interaction open-ended question: Provide any comments about your feelings, expectations or concerns regarding your use of IVALA™. (n = 24).

| <b>Comment category</b>                                     | <b>Number of comments</b> | <b>Percentage of students providing a comment fitting this category</b> |
|-------------------------------------------------------------|---------------------------|-------------------------------------------------------------------------|
| IVALA™ was benefit to learning of anatomy                   | 13                        | 54.2                                                                    |
| I had technical issues with IVALA™                          | 8                         | 33.3                                                                    |
| The accuracy and/or fidelity of IVALA™ needs to be improved | 4                         | 16.7                                                                    |
| IVALA™ is not a valid substitute for dissection             | 4                         | 16.7                                                                    |
| I would like this program for the iPad                      | 3                         | 12.5                                                                    |
| I found other computerized programs to be more helpful      | 2                         | 8.3                                                                     |
| I would like IVALA™ to have quiz capability                 | 1                         | 4.2                                                                     |
| I needed more guidance                                      | 1                         | 4.2                                                                     |
| I appreciate interaction of IVALA                           | 1                         | 4.2                                                                     |
